# Supplementary material
Source: Elsevier journal article supplement (https://www.sciencedirect.com/science/article/pii/S0120563319300737)
Supplement: mmc1 [file S0120563319300737:mmc1.docx]

**Anexo 1 Cuestionario MLHFQ**

**Validación de la Escala *"Minnesota Living with Heart Failure***

***Questionnaire"* (MLHFQ) de calidad de vida en Colombia¥.**

Las siguientes preguntas son acerca de cuánto su falla cardíaca (enfermedad del corazón) ha afectado su vida durante el último mes (últimas 4 semanas). Después de cada pregunta, encierre en un círculo el 0, 1, 2, 3, 4 o 5 para indicar cuánto se ha visto afectada su vida. Si alguna pregunta no aplica para usted, encierre en un círculo el 0.

Recuerde que:

0 es No

1 muy poco

2 poco

3 algo

4 mucho

5 muchísimo.

¿Su falla cardiaca no le ha permitido vivir como usted desea durante el último mes (últimas 4 semanas) porque…

|  |  | | **No** | **Muy poco** | **Poco** | **Algo** | **Mucho** | **Muchísimo** |
| --- | --- | --- | --- | --- | --- | --- | --- | --- |
| 1. | ¿Se le han hinchado sus tobillos o piernas? | | 0   | 1   | 2   | 3   | 4   | 5   |
| 2. | ¿Se ha tenido que sentar o acostar a descansar durante el día? | | 0   | 1   | 2   | 3   | 4   | 5   |
| 3. | ¿Se le ha dificultado salir a caminar o subir escaleras? | | 0   | 1   | 2   | 3   | 4   | 5   |
| 4. | ¿Se le ha dificultado hacer labores domésticas livianas? | | 0   | 1   | 2   | 3   | 4   | 5   |
| 5. | ¿Se le ha dificultado ir a sitios lejanos de su casa? | | 0   | 1   | 2   | 3   | 4   | 5   |
| 6. | ¿Se le ha dificultado dormir bien en las noches? | | 0   | 1   | 2   | 3   | 4   | 5   |
| 7. | ¿Se le ha dificultado relacionarse o realizar actividades con sus amigos o familiares? | | 0   | 1   | 2   | 3   | 4   | 5   |
| 8. | ¿Se le ha dificultado trabajar para su sostenimiento económico? | | 0   | 1   | 2   | 3   | 4   | 5   |
| 9. | ¿Se le ha dificultado realizar sus actividades de recreación, deporte y  pasatiempos? | | 0   | 1   | 2   | 3   | 4   | 5   |
| 10. | ¿Se le ha dificultado tener relaciones sexuales? | No aplica   | 0   | 1   | 2   | 3   | 4   | 5   |
| 11. | ¿Ha comido menos los alimentos que le gustan? | | 0   | 1   | 2   | 3   | 4   | 5   |
| 12. | ¿Ha sentido que le falta el aire? | | 0   | 1   | 2   | 3   | 4   | 5   |
| 13. | ¿Se ha cansado, fatigado o sentido sin energías? | | 0   | 1   | 2   | 3   | 4   | 5   |
| 14. | ¿Ha tenido que estar hospitalizado? | | 0   | 1   | 2   | 3   | 4   | 5   |
| 15. | ¿Ha tenido que gastar dinero en su cuidado médico? | | 0   | 1   | 2   | 3   | 4   | 5   |
| 16. | ¿Ha tenido efectos secundarios por causa de los tratamientos? | | 0   | 1   | 2   | 3   | 4   | 5   |
| 17. | ¿Se ha sentido una carga para su familia o amigos? | | 0   | 1   | 2   | 3   | 4   | 5   |
| 18. | ¿Ha sentido que pierde el control de su vida? | | 0   | 1   | 2   | 3   | 4   | 5   |
| 19. | ¿Se ha sentido preocupado? | | 0   | 1   | 2   | 3   | 4   | 5   |
| 20. | ¿Le ha sido difícil concentrarse o recordar cosas? | | 0   | 1   | 2   | 3   | 4   | 5   |
| 21. | ¿Se ha sentido deprimido? | | 0   | 1   | 2   | 3   | 4   | 5   |
|  |  |  |  |  |  |  |  |  |

**Nombre del evaluador ____________________________________________________**

**Anexo 2**Análisis factorial confirmatorio de acuerdo con el modelo de Xiuzhen Fan, que muestra tres dominios.

Escala original Rector TS, Kubo SH, Cohn JN. Heart Fail. 1987;3:198-219.

**¥** Lugo Agudelo LH y coinvestigadores. Grupo Rehabilitación en Salud, Universidad de Antioquia y Clínica Las Américas.
